# Supplementary material for: Role of Diffusion Tensor Imaging in Prognostication and Treatment Monitoring in Niemann-Pick Disease Type C1
Source: Diseases. 2016 Sep 8;4(3):29. doi: 10.3390/diseases4030029 (PMC5456286; doi:10.3390/diseases4030029)
Supplement: Supplementary file 1 [file diseases-04-00029-s001.xlsx]

## Sheet: Sheet1
Table S1. Spearman Correlations of Cerebellar Measures with NPC Neurologiccal Total Severity and Subcategory Scores
		Severity Score		Eye Movement																														Auditory Brain				Age at First		Duration of
						Ambulation		Speech		Swallow		Fine Motor		Cognition		Hearing		Memory		Seizures		Cataplexy		Narcolepsy		Behavior		Psychology		Hyperreflexia		Incontinence		Stem Response		Respiratory		Neurological Symptoms		Neurological Symptoms
Cerebellar Measures		r	p	r	p	r	p	r	p	r	p	r	p	r	p	r	p	r	p	r	p	r	p	r	p	r	p	r	p	r	p	r	p	r	p	r	p	r	p	r	p
FA	R inferior peduncle	-0.38	0.0156	-0.43	0.0068	-0.5	0.0013	-0.46	0.01	-0.46	0.0034	-0.31	0.0582	-0.24	0.1413	-0.28	0.0842	-0.26	0.1098	-0.29	0.0738	-0.16	0.3198	-0.08	0.6469	-0.08	0.6459	-0.06	0.7347	0.03	0.861	-0.21	0.1965	-0.21	0.1965	-0.11	0.5178	0.15	0.3885	-0.28	0.1116
	L inferior peduncle	-0.35	0.0281	-0.35	0.028	-0.45	0.0036	-0.4	0.0124	-0.44	0.0048	-0.34	0.0315	-0.2	0.2247	-0.25	0.1253	-0.17	0.3041	-0.11	0.4884	0.04	0.825	0.06	0.7077	-0.02	0.9219	-0.13	0.4185	-0.08	0.6458	-0.06	0.6974	-0.27	0.101	-0.17	0.2931	-0.02	0.9155	-0.37	0.0324
	R superior peduncle	-0.35	0.0308	-0.35	0.0307	-0.33	0.0414	-0.38	0.0183	-0.31	0.0578	-0.32	0.0481	-0.28	0.0891	-0.02	0.9006	-0.19	0.2498	-0.18	0.2668	-0.12	0.466	-0.09	0.606	-0.09	0.5778	-0.05	0.7702	-0.18	0.2692	-0.22	0.1812	-0.08	0.6167	-0.15	0.3696	-0.15	0.3995	-0.22	0.2144
	L superior peduncle	-0.41	0.0103	-0.26	0.1158	-0.34	0.037	-0.35	0.0309	-0.46	0.0034	-0.38	0.0158	-0.35	0.0294	-0.04	0.7914	-0.19	0.2453	-0.24	0.1441	-0.09	0.5735	-0.28	0.0874	-0.16	0.3404	-0.2	0.2131	-0.28	0.0811	-0.24	0.1452	-0.004	0.9779	-0.3	0.0659	-0.24	0.1799	-0.38	0.0306
	R middle peduncle	-0.3	0.0628	-0.1	0.5642	-0.34	0.0359	-0.22	0.1837	-0.41	0.009	-0.11	0.5101	-0.28	0.0852	0.02	0.9201	-0.19	0.2572	-0.1	0.5539	0.15	0.3727	-0.01	0.9578	-0.2	0.222	-0.35	0.0309	-0.25	0.1203	0.06	0.7221	-0.04	0.8026	-0.38	0.0185	-0.54	0.0012	-0.41	0.0174
	L middle peduncle	-0.07	0.6872	0.2	0.2183	-0.15	0.3467	-0.08	0.6348	-0.16	0.3175	0.001	0.9935	-0.11	0.4883	0.09	0.5606	0.04	0.7998	0.004	0.9799	0.3	0.0679	0.07	0.6744	0	1	-0.27	0.0673	-0.2	0.2115	0.09	0.5878	0.08	0.6167	-0.32	0.0454	-0.39	0.0266	-0.23	0.206
	R white matter	-0.33	0.0396	-0.3	0.063	-0.55	0.0003	-0.46	0.0035	-0.34	0.0336	-0.27	0.0945	-0.21	0.2085	-0.18	0.2717	-0.25	0.1266	-0.29	0.0728	-0.06	0.7264	-0.14	0.4006	0.1	0.5555	-0.06	0.7004	-0.04	0.8257	-0.2	0.2116	0.005	0.9779	-0.16	0.3424	0.16	0.3776	0.05	0.7995
	L white matter	-0.18	0.2718	-0.16	0.3183	-0.41	0.0103	-0.47	0.0027	-0.13	0.4453	-0.2	0.2258	-0.09	0.5817	-0.15	0.3547	-0.22	0.1687	-0.29	0.0775	0.01	0.9407	-0.19	0.2375	0.14	0.39	0.09	0.6057	0.11	0.3232	-0.13	0.437	-0.05	0.76	0.12	0.4603	0.28	0.1084	0.24	0.1788
	R cerebellum	-0.42	0.0082	-0.32	0.0491	-0.56	0.0002	-0.34	0.0333	-0.35	0.0306	-0.36	0.0246	-0.33	0.0427	-0.05	0.774	-0.2	0.2238	-0.28	0.0796	-0.12	0.4623	-0.19	0.2513	-0.05	0.7937	-0.09	0.5961	-0.26	0.1106	-0.19	0.2412	-0.28	0.0788	0.02	0.9023	-0.19	0.2833	-0.32	0.073
	L cerebellum	-0.35	0.0271	-0.34	0.0346	-0.53	0.0005	-0.38	0.0175	-0.29	0.0715	-0.31	0.0535	-0.24	0.1493	-0.11	0.5238	-0.15	0.3629	-0.33	0.0398	-0.19	0.2522	-0.21	0.2105	0.12	0.4707	0.09	0.6012	-0.22	0.1793	-0.16	0.3175	-0.28	0.084	0.12	0.4643	-0.09	0.6053	-0.22	0.2155
	Whole cerebellum	-0.4	0.0111	-0.34	0.0328	-0.56	0.0002	-0.38	0.0183	-0.34	0.0337	-0.35	0.027	-0.3	0.0595	-0.04	0.8089	-0.19	0.2556	-0.33	0.0405	-0.18	0.2629	-0.22	0.1884	0.04	0.7937	0.01	0.9562	-0.26	0.1057	-0.19	0.2466	-0.3	0.0648	0.07	0.6744	-0.15	0.4113	-0.29	0.1071
V	R inferior peduncle	-0.35	0.0278	-0.07	0.6517	-0.36	0.0254	-0.36	0.026	-0.36	0.0264	-0.46	0.003	-0.37	0.0207	0.04	0.812	-0.18	0.2747	-0.4	0.0116	-0.03	0.8391	-0.25	0.1192	0.23	0.1644	-0.03	0.872	-0.35	0.0281	-0.29	0.075	0.28	0.0788	0.04	0.7968	0.14	0.4477	-0.2	0.2733
	L inferior peduncle	-0.31	0.0562	-0.12	0.453	-0.32	0.0447	-0.2	0.2156	-0.31	0.0518	-0.4	0.0126	-0.33	0.0377	-0.01	0.9518	-0.08	0.6279	-0.36	0.0262	0.07	0.6678	-0.11	0.5232	0.1	0.5555	-0.13	0.4163	-0.21	0.1921	-0.3	0.062	0.25	0.1207	-0.19	0.2448	0.09	0.6178	-0.26	0.1476
	R superior peduncle	-0.46	0.0031	-0.35	0.0276	-0.58	0.0001	-0.42	0.0071	-0.48	0.0019	-0.53	0.0005	-0.4	0.0107	-0.09	0.5935	-0.16	0.3391	-0.48	0.0018	-0.04	0.8215	-0.19	0.2424	0.06	0.6947	-0.004	0.9774	-0.3	0.0597	-0.31	0.0517	0.09	0.578	-0.09	0.5958	0.05	0.7821	-0.34	0.0566
	L superior peduncle	-0.49	0.0014	-0.37	0.0216	-0.61	0.0001	-0.45	0.0041	-0.55	0.0003	-0.52	0.0008	-0.42	0.0075	-0.08	0.6149	-0.14	0.3813	-0.43	0.0064	-0.11	0.5103	-0.25	0.1201	0.11	0.9913	0.05	0.7541	-0.32	0.0496	-0.19	0.2539	0.07	0.6768	-0.13	0.4202	0.03	0.8611	-0.34	0.0531
	R middle peduncle	-0.14	0.408	-0.01	0.963	-0.29	0.0703	-0.34	0.0331	-0.09	0.578	-0.26	0.1146	-0.15	0.3629	0.04	0.7883	0.003	0.9832	-0.31	0.0584	0.04	0.9802	-0.3	0.0678	0.28	0.0893	0.18	0.2612	-0.16	0.3324	-0.2	0.2324	0.28	0.0788	0.09	0.5945	0.36	0.0413	0.18	0.3057
	L middle peduncle	-0.19	0.2451	-0.04	0.7968	-0.32	0.05	-0.39	0.0152	-0.12	0.4697	-0.29	0.0785	-0.21	0.1933	0.04	0.8254	-0.1	0.5556	-0.32	0.0488	0.02	0.9191	-0.3	0.0671	0.23	0.1543	0.13	0.4385	-0.19	0.2542	-0.24	0.1407	0.26	0.1073	0.13	0.424	0.32	0.0691	0.21	0.2475
	R white matter	-0.26	0.1054	-0.19	0.259	-0.44	0.0055	-0.42	0.0084	-0.26	0.1107	-0.31	0.0586	-0.25	0.1247	-0.08	0.6357	-0.12	0.4734	-0.27	0.096	-0.05	0.7606	-0.15	0.369	0.17	0.3077	0.14	0.4084	-0.13	0.4225	-0.16	0.3161	0.14	0.4027	0.1	0.5642	0.29	0.1073	-0.01	0.9728
	L white matter	-0.3	0.0663	-0.19	0.2352	-0.45	0.0036	-0.5	0.0013	-0.29	0.0772	-0.36	0.0247	-0.25	0.1247	-0.12	0.4853	-0.17	0.3112	-0.33	0.0426	-0.12	0.4674	-0.23	0.1513	0.22	0.175	0.19	0.2592	-0.15	0.3461	-0.17	0.3133	0.17	0.2878	0.13	0.4469	0.4	0.0212	0.1	0.5723
	R cerebellum	0.23	0.1664	0.29	0.0781	0.42	0.007	0.28	0.0883	0.23	0.1679	0.15	0.3453	0.13	0.4321	0.11	0.5203	0.19	0.2504	0.07	0.6926	0.09	0.6032	-0.06	0.7315	0.01	0.9739	-0.09	0.5903	-0.08	0.6458	-0.04	0.8067	0.5	0.0012	-0.11	0.4889	0.003	0.9829	0.17	0.3579
	L cerebellum	0.22	0.1725	0.26	0.1099	0.46	0.0033	0.28	0.087	0.24	0.139	0.14	0.4091	0.15	0.3608	0.06	0.7101	0.15	0.3639	0.09	0.5962	0.14	0.3851	0.1	0.5514	-0.05	0.7686	-0.07	0.6673	-0.04	0.7927	-0.09	0.5818	0.38	0.0181	-0.15	0.3781	-0.04	0.8037	0.05	0.7696
	Whole cerebellum	0.19	0.2418	0.24	0.1335	0.42	0.0072	0.26	0.1089	0.23	0.1634	0.11	0.5154	0.1	0.5447	0.07	0.6626	0.13	0.4406	0.05	0.7441	0.11	0.5191	0.01	0.942	-0.05	0.7437	-0.12	0.4823	-0.07	0.6709	-0.11	0.5115	0.45	0.004	-0.13	0.4441	-0.01	0.9458	0.11	0.5423
MD	R inferior peduncle	0.25	0.1189	0.35	0.0308	0.45	0.0039	0.23	0.1662	0.25	0.1285	0.15	0.3502	0.1	0.5251	0.15	0.3722	0.16	0.3407	0.21	0.2003	0.11	0.4886	0.11	0.4886	0.09	0.6005	-0.04	0.7885	-0.13	0.4367	0.05	0.7482	0.32	0.0493	0.12	0.4739	0.04	0.821	0.21	0.2409
	L inferior peduncle	0.25	0.124	0.31	0.0513	0.44	0.0046	0.24	0.1402	0.3	0.067	0.19	0.2505	0.09	0.5791	0.1	0.553	0.18	0.2695	0.2	0.2203	0.09	0.6	-0.03	0.8333	0.1	0.5555	-0.06	0.7284	-0.2	0.2176	0.03	0.8584	0.18	0.2627	0.13	0.4288	-0.12	0.5151	0.2	0.2647
	R superior peduncle	0.14	0.4021	0.34	0.0336	0.29	0.0761	0.21	0.1957	0.05	0.7404	0.01	0.9569	0.03	0.8646	0.02	0.9106	0.14	0.3902	0.01	0.9625	0.05	0.7778	-0.13	0.4181	0.18	0.2771	-0.1	0.5448	-0.21	0.2095	-0.02	0.8856	0.48	0.0019	0.04	0.8209	0.18	0.3053	0.04	0.8117
	L superior peduncle	0.25	0.1299	0.35	0.0308	0.35	0.0314	0.28	0.0887	0.27	0.097	0.15	0.3656	0.08	0.6363	0.08	0.6159	0.17	0.2986	0.15	0.3663	0.06	0.7162	-0.01	0.9514	0.14	0.3933	0.05	0.7409	-0.1	0.5319	0.02	0.9221	0.48	0.0021	0.12	0.482	0.2	0.2694	0.22	0.2216
	R middle peduncle	0.35	0.027	0.39	0.0131	0.48	0.0021	0.45	0.0037	0.37	0.0203	0.29	0.0775	0.18	0.269	0.19	0.2357	0.32	0.0456	0.3	0.0646	0.16	0.3346	-0.02	0.8999	0.03	0.8702	0.02	0.893	-0.04	0.8215	0.13	0.4293	0.28	0.0788	0.004	0.9788	-0.09	0.608	0.22	0.227
	L middle peduncle	0.27	0.0922	0.26	0.1093	0.52	0.0006	0.43	0.0062	0.27	0.1009	0.22	0.169	0.15	0.3568	0.09	0.566	0.28	0.081	0.29	0.0719	0.08	0.6079	0.07	0.6503	-0.05	0.7686	0.02	0.8807	-0.02	0.8819	0.09	0.5838	0.18	0.2627	-0.18	0.2648	-0.13	0.4863	0.01	0.9389
	R white matter	0.33	0.0409	0.39	0.0141	0.51	0.0009	0.42	0.0085	0.35	0.0306	0.27	0.0954	0.17	0.3042	0.18	0.2664	0.23	0.1638	0.25	0.1188	0.15	0.3764	0.004	0.9831	0.02	0.896	-0.03	0.8562	0.0004	0.9979	0.15	0.3506	0.24	0.143	-0.01	0.9649	-0.14	0.4528	0.18	0.3235
	L white matter	0.3	0.0657	0.36	0.0232	0.53	0.0005	0.46	0.0032	0.32	0.0471	0.27	0.0954	0.15	0.3571	0.18	0.2865	0.23	0.1664	0.25	0.1311	0.13	0.4198	0.07	0.6647	0.04	0.819	-0.05	0.7506	-0.04	0.8215	0.13	0.4483	0.24	0.143	-0.19	0.2342	-0.22	0.2181	0.09	0.6305
	R cerebellum	0.37	0.0204	0.37	0.0215	0.53	0.0006	0.4	0.0109	0.36	0.026	0.34	0.0329	0.22	0.1774	0.15	0.3537	0.26	0.1064	0.26	0.1149	0.15	0.3557	0.09	0.582	-0.02	0.9219	0.04	0.7856	0.03	0.8631	0.12	0.45	0.33	0.0427	0.06	0.7227	0.03	0.8479	0.26	0.1419
	L cerebellum	0.35	0.0304	0.34	0.0363	0.5	0.0013	0.36	0.0252	0.35	0.0271	0.31	0.0554	0.2	0.214	0.15	0.3491	0.24	0.1377	0.28	0.0807	0.15	0.3703	0.08	0.6134	-0.03	0.8446	0.04	0.8111	0.04	0.8071	0.11	0.4875	0.32	0.0459	0.09	0.5996	0.08	0.6532	0.29	0.1045
	Whole cerebellum	0.37	0.0214	0.36	0.0244	0.52	0.0007	0.39	0.0137	0.36	0.025	0.34	0.0369	0.22	0.1717	0.16	0.3381	0.26	0.1133	0.28	0.0794	0.17	0.3055	0.1	0.546	-0.02	0.896	0.03	0.8677	0.04	0.7886	0.13	0.4413	0.31	0.0528	0.06	0.7276	0.05	0.7835	0.27	0.1226
Key: R=Right; L=Left; FA=Fractional Anisotropy; V=Volume; MD=Mean Diffusivity

## Sheet: Sheet2
Table S2. Multiple Regression of Neurological Subcategories on Cerebellar Measures and Age at Scan
				Severity Score							Eye Movement							Ambulation							Speech								Swallow							Fine Motor							Cognition
			Parameter			Model	Model	Model		Parameter			Model	Model	Model		Parameter			Model	Model	Model		Parameter			Model	Model	Model		Parameter			Model	Model	Model		Parameter			Model	Model	Model		Parameter			Model	Model
Cerebellar Measures		r	Estimate	t value	p <	F value	p <	R-square	r	Estimate	t value	p <	F value	p <	R-square	r	Estimate	t value	p <	F value	p <	R-square	r	Estimate	t value	p <	F value	p <	R-square	r	Estimate	t value	p <	F value	p <	R-square	r	Estimate	t value	p <	F value	p <	R-square	r	Estimate	t value	p <	F value	p <
FA	R inferior peduncle	-0.02	-78.01	-2.14	0.05	6.01	0.01	0.25	-0.04	-8.41	-2.23	0.05	5.74	0.01	0.24	-0.17	-14.2	-2.81	0.01	5.79	0.01	0.24	-0.22	-8.39	-2.32	0.05	3.02	0.07	0.14	0.04	-11.6	-2.37	0.05	10.07	0.001	0.36	-0.02	-8.95	-1.64	0.11	3.45	0.05	0.16	0.22	-2.95	-0.61	0.55	6.06	0.01
	Age at scan	0.39	1.16	3.47	0.01				0.37	0.12	3.37	0.01				0.28	0.15	3.2	0.01				0.13	0.07	2.02	0.06				0.51	0.2	4.48	0.0001				0.31	0.13	2.62	0.05				0.49	0.14	3.14	0.01
	L inferior peduncle	0.06	-65.55	-1.42	0.17	4.5	0.05	0.2	0.04	-7.3	-1.53	0.14	4.22	0.05	0.19	-0.11	-14.91	-2.34	0.05	4.5	0.05	0.2	-0.19	-9.41	-2.1	0.05	2.54	0.1	0.12	0.1	-11.13	-1.81	0.08	8.49	0.01	0.32	-0.03	-11.59	-1.75	0.09	3.65	0.05	0.17	0.28	-0.64	-0.11	0.92	5.82	0.01
	Age at scan		1.04	2.97	0.01					0.1	2.89	0.01					0.14	2.9	0.01					0.06	1.9	0.07					0.19	4.05	0.001					0.14	2.7	0.05					0.13	2.81	0.01
	R superior peduncle	0.1	-29.71	-0.53	0.6	3.47	0.05	0.16	-0.01	-7.66	-1.34	0.19	3.9	0.05	0.18	0.04	-5.11	-0.63	0.54	1.74	0.2	0.09	-0.1	-6.11	-1.1	0.28	0.91	0.42	0.05	0.23	0.07	0.01	0.99	6.29	0.01	0.26	0.03	-6.25	-0.77	0.45	2.29	0.12	0.11	0.2	-1.37	-0.2	0.85	5.84	0.01
	Age at scan		0.82	2.54	0.05					0.09	2.79	0.01					0.09	1.85	0.08					0.04	1.19	0.25					0.14	3.16	0.01					0.1	2.13	0.05					0.13	3.14	0.01
	L superior peduncle	-0.01	-76.63	-1.36	0.19	4.41	0.05	0.2	0.02	-6.29	-1.06	0.3	3.52	0.05	0.16	-0.02	-8.25	-1.01	0.33	2.07	0.15	0.1	-0.12	-6.86	-1.21	0.24	1.04	0.37	0.05	0.07	-9.17	-1.19	0.25	7.25	0.01	0.29	-0.07	-12.22	-1.49	0.15	3.2	0.06	0.15	0.12	-5.47	-0.77	0.45	6.2	0.01
	Age at scan		0.93	2.97	0.01					0.09	2.65	0.05					0.09	2.03	0.05					0.04	1.23	0.23					0.16	3.77	0.001					0.11	2.49	0.05					0.14	3.43	0.01
	R middle peduncle	0.18	-30.75	-0.4	0.69	3.4	0.05	0.16	0.32	6.94	0.88	0.39	3.32	0.05	0.16	0	-13.43	-1.25	0.23	2.36	0.11	0.12	-0.02	-5.1	-0.67	0.51	0.52	0.6	0.03	0.15	-12.74	-1.26	0.22	7.35	0.01	0.29	0.18	-0.13	-0.01	0.99	1.96	0.16	0.1	0.26	-1.92	-0.2	0.85	5.84	0.01
	Age at scan		0.82	2.34	0.05					0.05	1.48	0.15					0.11	2.17	0.05					0.04	1.01	0.32					0.17	3.69	0.001					0.08	1.63	0.12					0.13	2.91	0.01
	L middle peduncle	0.19	5.17	0.07	0.95	3.31	0.05	0.16	0.47	15.72	2.29	0.05	5.91	0.01	0.25	0.02	-8.07	-0.8	0.43	1.87	0.17	0.09	-0.003	-2.99	-0.42	0.68	0.38	0.69	0.02	0.19	-3.43	-0.36	0.73	6.37	0.01	0.26	0.16	0.74	0.07	0.95	1.96	0.16	0.1	0.22	-0.99	-0.11	0.92	5.82	0.01
	Age at scan		0.73	2.24	0.05					0.04	1.2	0.24					0.09	1.93	0.07					0.03	0.87	0.39					0.15	3.31	0.01					0.08	1.72	0.1					0.12	3.07	0.01
	R white matter	-0.09	-202.26	-2.48	0.05	6.94	0.01	0.28	-0.1	-20.62	-2.42	0.05	6.26	0.01	0.26	-0.24	-36.9	-3.31	0.01	7.46	0.01	0.29	-0.29	-22.42	-2.8	0.01	4.27	0.05	0.19	-0.01	-27.88	-2.52	0.05	10.57	0.001	0.37	-0.07	-22.95	-1.86	0.08	3.89	0.05	0.18	0.09	-15.21	-1.42	0.17	7.15	0.01
	Age at scan		1.16	3.67	0.001					0.11	3.47	0.01					0.15	3.44	0.01					0.07	2.2	0.05					0.2	4.6	0.0001					0.13	2.75	0.01					0.15	3.72	0.001
	L white matter	-0.11	-214	-2.62	0.05	7.38	0.01	0.29	-0.03	-15.11	-1.69	0.1	4.53	0.05	0.2	-0.28	-36.7	-3.6	0.001	8.56	0.001	0.32	-0.36	-26.69	-3.45	0.01	6.35	0.01	0.26	-0.01	-26.79	-2.38	0.05	10.11	0.001	0.36	-0.12	-27.01	-2.21	0.05	4.67	0.05	0.21	0.06	-17.44	-1.63	0.12	7.57	0.01
	Age at scan		1.16	3.76	0.001					0.1	3	0.01					0.15	3.6	0.01					0.07	2.53	0.05					0.19	4.5	0.0001					0.14	2.95	0.01					0.16	3.87	0.001
	R cerebellum	-0.3	-124.42	-1.11	0.28	4.03	0.05	0.18	-0.36	-18.28	-1.59	0.13	4.34	0.05	0.19	-0.37	-29.81	-1.9	0.07	3.48	0.05	0.16	-0.16	-8.61	-0.76	0.46	0.58	0.57	0.03	-0.29	-12.09	-0.79	0.44	6.7	0.01	0.27	-0.24	-14.3	-0.87	0.4	2.38	0.11	0.12	-0.26	-8.59	-0.61	0.55	6.06	0.01
	Age at scan		0.62	2.04	0.05					0.05	1.74	0.1					0.04	1.02	0.32					0.01	0.44	0.66					0.13	3.05	0.01					0.07	1.55	0.13					0.11	2.98	0.01
	L cerebellum	-0.35	-189.07	-1.6	0.12	4.82	0.05	0.21	-0.43	-26.98	-2.27	0.05	5.84	0.01	0.25	-0.42	-39.04	-2.38	0.05	4.59	0.05	0.2	-0.22	-13.76	-1.14	0.27	0.96	0.4	0.05	-0.32	-19.07	-1.17	0.26	7.21	0.01	0.29	-0.28	-21.82	-1.25	0.23	2.82	0.08	0.14	-0.29	-14.46	-0.96	0.35	6.43	0.01
	Age at scan		0.59	2.01	0.052					0.05	1.7	0.1					0.04	1.02	0.32					0.01	0.37	0.72					0.12	3.05	0.01					0.07	1.52	0.14					0.11	2.96	0.01
	Whole cerebellum	-0.32	-156.49	-1.35	0.19	4.39	0.05	0.2	-0.39	-22.62	-1.92	0.07	5.01	0.05	0.22	-0.4	-34.54	-2.14	0.05	4	0.05	0.18	-0.19	-11.15	-0.95	0.35	0.75	0.49	0.04	-0.3	-15.54	-0.98	0.34	6.93	0.01	0.28	-0.26	-18.03	-1.06	0.3	2.58	0.09	0.13	-0.27	-11.47	-0.78	0.44	6.22	0.01
	Age at scan		0.6	2.01	0.052					0.05	1.7	0.1					0.04	1.01	0.33					0.01	0.4	0.7					0.13	3.04	0.01					0.07	1.53	0.14					0.11	2.96	0.01
V	R inferior peduncle	-0.17	-0.03	-2.48	0.05	6.95	0.01	0.28	0.02	-0.001	-0.88	0.39	3.32	0.05	0.16	-0.24	-0.005	-2.59	0.05	5.15	0.05	0.22	-0.24	-0.003	-2.01	0.06	2.35	0.11	0.12	-0.16	-0.005	-2.97	0.01	12.24	0.0001	0.4	-0.29	-0.01	-3.23	0.01	7.74	0.01	0.3	-0.13	-0.004	-2.62	0.05	10.37	0.001
	Age at scan	0.39	1.02	3.52	0.01				0.37	0.08	2.57	0.05				0.28	0.11	2.75	0.01				0.13	0.05	1.52	0.14				0.51	0.18	4.8	0.0001				0.31	0.13	3.32	0.01				0.49	0.16	4.45	0.0001
	L inferior peduncle	-0.19	-0.03	-2.32	0.05	6.48	0.01	0.26	-0.03	-0.001	-0.99	0.33	3.44	0.05	0.16	-0.3	-0.005	-2.8	0.01	5.76	0.01	0.24	-0.2	-0.002	-1.56	0.13	1.52	0.24	0.08	-0.19	-0.005	-2.83	0.01	11.7	0.001	0.39	-0.31	-0.01	-3.03	0.01	7.03	0.01	0.28	-0.14	-0.003	-2.27	0.05	9.21	0.001
	Age at scan		0.94	3.33	0.01					0.08	2.61	0.05					0.11	2.69	0.05					0.04	1.23	0.23					0.17	4.6	0.0001					0.12	3.04	0.05					0.15	4.17	0.001
	R superior peduncle	-0.35	-0.03	-3.12	0.01	9.08	0.001	0.34	-0.29	-0.003	-2.53	0.05	6.57	0.01	0.27	-0.48	-0.005	-4.01	0.001	10.22	0.001	0.36	-0.37	-0.003	-2.63	0.05	3.81	0.05	0.17	-0.32	-0.004	-3.23	0.01	13.34	0.0001	0.43	-0.42	-0.005	-3.48	0.01	8.67	0.001	0.33	-0.21	-0.003	-2.18	0.05	8.95	0.001
	Age at scan		0.88	3.38	0.01					0.08	2.98	0.01					0.1	2.73	0.01					0.03	1.26	0.22					0.16	4.51	0.0001					0.1	2.83	0.01					0.13	3.94	0.001
	L superior peduncle	-0.36	-0.03	-3.07	0.01	8.87	0.001	0.33	-0.32	-0.002	-2.61	0.05	6.81	0.01	0.27	-0.49	-0.005	-4.02	0.001	10.26	0.001	0.36	-0.41	-0.003	-2.87	0.01	4.47	0.05	0.2	-0.38	-0.004	-3.67	0.001	15.38	0.0001	0.46	-0.41	-0.004	-3.29	0.01	7.97	0.01	0.31	-0.26	-0.003	-2.43	0.05	9.73	0.001
	Age at scan		0.85	3.27	0.01					0.08	2.93	0.01					0.09	2.61	0.05					0.03	1.22	0.24					0.16	4.61	0.0001					0.1	2.67	0.05					0.13	3.97	0.001
	R middle peduncle	-0.11	-0.01	-2.29	0.05	6.42	0.01	0.26	0.06	-0.0002	-0.85	0.41	3.29	0.05	0.15	-0.25	-0.001	-2.98	0.01	6.33	0.01	0.26	-0.27	-0.0004	-2.47	0.05	3.39	0.05	0.16	-0.07	-0.0006	-2.65	0.05	11.02	0.001	0.38	-0.17	-0.001	-2.39	0.05	5.14	0.05	0.22	-0.07	-0.001	-2.58	0.05	10.22	0.001
	Age at scan		1.07	3.5	0.01					0.09	2.54	0.05					0.13	3.11	0.01					0.06	1.88	0.07					0.19	4.66	0.0001					0.13	3	0.01					0.17	4.49	0.0001
	L middle peduncle	-0.14	-0.003	-2.42	0.05	6.78	0.01	0.27	0.03	-0.0002	-0.96	0.35	3.4	0.05	0.16	-0.25	-0.001	-2.82	0.01	5.83	0.01	0.25	-0.31	-0.0004	-2.7	0.05	3.98	0.05	0.18	-0.09	-0.0005	-2.59	0.05	10.82	0.001	0.38	-0.2	-0.001	-2.49	0.05	5.39	0.01	0.23	-0.13	-0.0005	-2.86	0.01	11.22	0.001
	Age at scan		1.05	3.54	0.01					0.09	2.6	0.05					0.12	2.95	0.01					0.06	1.91	0.07					0.18	4.6	0.0001					0.13	3	0.01					0.17	4.64	0.0001
	R white matter	-0.25	-0.003	-2.66	0.05	7.5	0.01	0.29	-0.19	-0.0003	-2.11	0.05	5.44	0.01	0.23	-0.39	-0.001	-3.48	0.01	8.09	0.01	0.31	-0.4	-0.0004	-3.08	0.01	5.12	0.05	0.22	-0.2	-0.0004	-2.71	0.05	11.24	0.001	0.38	-0.27	-0.0004	-2.54	0.05	5.53	0.01	0.23	-0.17	-0.0004	-2.37	0.05	9.52	0.001
	Age at scan		0.94	3.43	0.01					0.09	3.02	0.01					0.11	2.89	0.01					0.04	1.67	0.11					0.17	4.48	0.0001					0.11	2.76	0.01					0.14	4.17	0.001
	L white matter	-0.29	-0.003	-3.21	0.01	9.42	0.001	0.34	-0.19	-0.0003	-2.21	0.05	5.7	0.01	0.24	-0.41	-0.001	-3.88	0.001	9.69	0.001	0.35	-0.46	-0.0004	-3.75	0.001	7.45	0.01	0.29	-0.25	-0.0005	-3.46	0.01	14.38	0.0001	0.44	-0.3	-0.0005	-3.01	0.01	6.97	0.01	0.28	-0.2	-0.0004	-2.91	0.01	11.41	0.001
	Age at scan		1.01	3.78	0.01					0.09	3.12	0.01					0.12	3.2	0.01					0.05	2.04	0.05					0.18	4.98	0.0001					0.13	3.05	0.01					0.15	4.51	0.0001
	R cerebellumA	0.12	0	0.71	0.49	3.6	0.05	0.17	0.23	3e-05	1.42	0.17	4.04	0.05	0.18	0.31	3e-05	1.94	0.07	3.56	0.05	0.17	0.21	2e-05	1.27	0.22	1.11	0.35	0.06	0.1	1e-05	0.53	0.61	6.47	0.01	0.26	0.09	1e-05	0.48	0.64	2.09	0.14	0.1	0.01	-2e-06	-0.06	0.95	5.82	0.01
	Age at scan		0.73	2.56	0.05					0.07	2.4	0.05					0.06	1.75	0.09					0.02	0.73	0.48					0.14	3.54	0.01					0.08	1.96	0.06					0.12	3.41	0.01
	L cerebellumA	0.15	0	1.03	0.31	3.94	0.05	0.18	0.24	3e-05	1.67	0.11	4.48	0.05	0.2	0.32	0.0001	2.17	0.05	4.08	0.05	0.18	0.21	2e-05	1.32	0.2	1.17	0.33	0.06	0.11	2e-05	0.88	0.39	6.81	0.01	0.27	0.12	2e-05	0.82	0.42	2.33	0.12	0.11	0.05	1e-05	0.44	0.66	5.94	0.01
	Age at scan		0.75	2.63	0.05					0.07	2.53	0.05					0.07	1.91	0.07					0.02	0.81	0.43					0.14	3.61	0.001					0.08	2.02	0.06					0.12	3.43	0.01
	Whole cerebellum	0.14	0	0.89	0.38	3.78	0.05	0.17	0.24	3e-05	1.58	0.13	4.31	0.05	0.19	0.24	3e-05	1.58	0.13	4.31	0.05	0.19	0.21	2e-05	1.31	0.2	1.17	0.33	0.06	0.11	2e-05	0.72	0.48	6.64	0.01	0.27	0.11	2e-05	0.67	0.51	2.21	0.13	0.11	0.03	5e-06	0.21	0.84	5.84	0.01
	Age at scan		0.74	2.59	0.05					0.07	2.47	0.05					0.07	2.47	0.05					0.02	0.77	0.45					0.14	3.57	0.01					0.08	1.99	0.06					0.12	3.41	0.01
MD	R inferior peduncle	0.14	12552	1.84	0.08	5.31	0.01	0.23	0.27	1889.96	2.81	0.01	7.45	0.01	0.29	0.34	2843.5	3.11	0.01	6.78	0.01	0.27	0.24	1254.94	1.84	0.08	2.01	0.15	0.1	0.07	1540.43	1.65	0.11	8.12	0.01	0.31	0.11	1398.92	1.38	0.18	3.01	0.07	0.14	-0.1	267.06	0.3	0.77	5.87	0.01
	Age at scan	0.39	0.9	3.11	0.01				0.37	0.1	3.36	0.01				0.28	0.11	2.8	0.01				0.13	0.04	1.31	0.2				0.51	0.16	4	0.001				0.31	0.1	2.35	0.05				0.49	0.13	3.35	0.01
	L inferior peduncle	0.15	10264	1.83	0.08	5.28	0.01	0.23	0.3	1647.06	3.01	0.01	8.13	0.01	0.31	0.35	2354.74	3.13	0.01	6.85	0.01	0.28	0.26	1093.2	1.96	0.06	2.23	0.13	0.11	0.13	1537.06	2.03	0.05	9.08	0.001	0.34	0.15	1303.99	1.57	0.13	3.33	0.05	0.16	-0.08	303.93	0.42	0.68	5.93	0.01
	Age at scan		0.88	3.09	0.01					0.09	3.4	0.01					0.11	2.75	0.01					0.04	1.31	0.2					0.16	4.16	0.001					0.1	2.4	0.05					0.13	3.4	0.01
	R superior peduncle	-0.06	3621.79	0.35	0.73	3.38	0.05	0.16	0.16	1923.37	1.89	0.07	4.94	0.05	0.22	0.11	1783.9	1.23	0.23	2.34	0.12	0.12	0.11	940.44	0.93	0.36	0.73	0.5	0.04	-0.2	-581.43	-0.42	0.68	6.41	0.01	0.26	-0.1	-81.98	-0.05	0.96	1.96	0.16	0.1	-0.19	-449.32	-0.35	0.73	5.89	0.01
	Age at scan		0.77	2.57	0.05					0.09	2.94	0.01					0.09	2.05	0.05					0.03	1	0.33					0.13	3.3	0.01					0.08	1.89	0.07					0.12	3.18	0.01
	L superior peduncle	0.06	9071.49	1.03	0.31	3.94	0.05	0.18	0.2	1761.06	2	0.06	5.19	0.05	0.22	0.23	2493.16	2.05	0.05	3.8	0.05	0.17	0.19	1225.51	1.41	0.17	1.3	0.29	0.07	-0.02	870.77	0.72	0.48	6.64	0.01	0.27	0.03	893.3	0.69	0.5	2.22	0.13	0.11	-0.18	-512.56	-0.46	0.65	5.95	0.01
	Age at scan		0.81	2.78	0.01					0.09	2.93	0.01					0.09	2.28	0.05					0.03	1.1	0.28					0.15	3.64	0.001					0.09	2.1	0.05					0.12	3.21	0.01
	R middle peduncle	0.19	16112	2.25	0.05	6.31	0.01	0.26	0.23	1848.87	2.52	0.05	6.55	0.01	0.27	0.38	3376.63	3.56	0.01	8.39	0.01	0.32	0.38	2023.09	2.95	0.01	4.7	0.05	0.21	0.09	1844.33	1.86	0.08	8.62	0.001	0.32	0.14	1745.86	1.62	0.12	3.41	0.05	0.16	-0.06	600.7	0.63	0.53	6.08	0.01
	Age at scan		0.93	3.29	0.01					0.09	3.23	0.01					0.11	2.99	0.01					0.05	1.69	0.11					0.16	4.1	0.001					0.1	2.44	0.05					0.13	3.46	0.01
	L middle peduncle	0.2	16918	2.4	0.05	6.71	0.01	0.27	0.15	1387.01	1.83	0.08	4.81	0.05	0.21	0.44	3781.61	4.21	0.001	11.14	0.001	0.38	0.42	2215.34	3.33	0.01	5.92	0.01	0.25	0.08	1781.49	1.8	0.09	8.47	0.01	0.32	0.17	1937.18	1.82	0.08	3.8	0.05	0.17	-0.02	915.11	0.98	0.34	6.45	0.01
	Age at scan		0.95	3.37	0.01					0.09	2.94	0.01					0.12	3.31	0.01					0.05	1.84	0.08					0.16	4.7	0.001					0.11	2.53	0.05					0.13	3.59	0.01
	R white matter	0.2	12378	2.18	0.05	6.12	0.01	0.25	0.28	1554.99	2.72	0.05	7.14	0.01	0.28	0.36	2438.16	3.16	0.01	6.95	0.01	0.28	0.39	1591.22	2.93	0.01	4.65	0.05	0.21	0.12	1455.8	1.86	0.08	8.61	0.001	0.32	0.15	1341.14	1.57	0.13	3.33	0.05	0.16	-0.02	549.77	0.74	0.47	6.17	0.01
	Age at scan		0.89	3.2	0.01					0.09	3.23	0.01					0.1	2.7	0.05					0.04	1.56	0.13					0.16	4.06	0.001					0.1	2.38	0.05					0.13	3.51	0.01
	L white matter	0.17	10839	1.94	0.06	5.54	0.01	0.24	0.26	1462.58	2.61	0.05	6.83	0.01	0.27	0.36	2372	3.17	0.01	6.97	0.01	0.28	0.36	1465.22	2.75	0.01	4.12	0.05	0.19	0.08	1233.92	1.6	0.12	8.02	0.01	0.31	0.13	1219.8	1.47	0.16	3.15	0.06	0.15	-0.05	427.08	0.59	0.57	6.04	0.01
	Age at scan		0.89	3.12	0.01					0.09	3.21	0.01					0.1	2.74	0.01					0.04	1.54	0.14					0.16	3.96	0.001					0.1	2.35	0.05					0.13	3.46	0.01
	R cerebellum	0.4	5248.47	2.1	0.05	5.92	0.01	0.25	0.52	774.28	3.18	0.01	8.73	0.001	0.33	0.55	1164.78	3.54	0.01	8.32	0.01	0.32	0.37	551.84	2.22	0.05	2.8	0.08	0.13	0.42	715.96	2.11	0.05	9.29	0.001	0.34	0.36	702.56	1.91	0.07	3.98	0.05	0.18	0.22	189.91	0.58	0.57	6.03	0.01
	Age at scan		0.58	2.03	0.05					0.05	1.72	0.09					0.04	0.96	0.35					0.005	0.16	0.88					0.12	3.03	0.01					0.06	1.47	0.16					0.12	3.13	0.01
	L cerebellum	0.39	5035.14	2.08	0.05	5.86	0.01	0.25	0.53	785.39	3.38	0.01	9.48	0.001	0.34	0.52	1071.83	3.31	0.01	7.46	0.01	0.29	0.34	492.29	2.02	0.06	2.37	0.11	0.12	0.41	715.63	2.19	0.05	9.51	0.001	0.35	0.34	637.29	1.77	0.09	3.71	0.05	0.17	0.2	177.03	0.56	0.59	6.02	0.01
	Age at scan		0.6	2.12	0.05					0.05	1.82	0.08					0.04	1.1	0.28					0.01	0.28	0.79					0.12	3.11	0.01					0.06	1.56	0.13					0.12	3.18	0.01
	Whole cerebellum	0.4	5182.6	2.1	0.05	5.92	0.01	0.25	0.53	786.72	3.3	0.01	9.17	0.001	0.34	0.53	1126.43	3.44	0.01	7.94	0.01	0.31	0.35	525.6	2.13	0.05	2.6	0.09	0.13	0.42	721.95	2.16	0.05	9.43	0.001	0.34	0.35	674.64	1.85	0.08	3.85	0.05	0.18	0.21	184.84	0.57	0.58	6.03	0.01
	Age at scan		0.58	2.07	0.05					0.05	1.76	0.09					0.04	1.03	0.31					0.01	0.22	0.83					0.12	3.06	0.01					0.06	1.51	0.14					0.12	3.15	0.01
Key: R=Right; L=Left; FA=Fractional Anisotropy; V=Volume; MD=Mean Diffusivity
[truncated: 92 more columns]

## Sheet: Sheet3
Table S3. ANCOVA of Neurological Subcategories, Miglustat and Cerebellar Measures
					Severity Score									Eye Movement									Ambulation									Speech									Swallowing
		Type I			Type III			Model	Model	Model	Type I			Type III			Model	Model	Model	Type I			Type III			Model	Model	Model	Type I			Type III			Model	Model	Model	Type I			Type III			Model	Model	Model	Type I
Cerebellar Measures		SS	F value	p <	SS	F value	p <	F value	p <	R-square	SS	F value	p <	SS	F value	p <	F value	p <	R-square	SS	F value	p <	SS	F value	p <	F value	p <	R-square	SS	F value	p <	SS	F value	p <	F value	p <	R-square	SS	F value	p <	SS	F value	p <	F value	p <	R-square	SS	F value	p <
FA	Miglustat	266.74	2.58	0.12	197.29	1.91	0.18	4.63	0.01	0.28	2.74	2.38	0.14	1.71	1.49	0.24	3.85	0.05	0.25	4.41	2.18	0.15	1.86	0.92	0.35	4.17	0.05	0.26	0.02	0.02	0.91	0.08	0.07	0.79	2.61	0.07	0.18	11.29	5.38	0.05	8.06	3.84	0.06	5.21	0.01	0.31	1.78	0.79	0.39
	R inferior peduncle	600.57	5.82	0.05	503.01	4.87	0.05				6.75	5.86	0.05	5.88	5.11	0.05				17	8.38	0.01	15.54	7.66	0.01				6.43	6.34	0.05	5.87	5.79	0.05				13.41	6.39	0.05	11.64	5.54	0.05				6.82	3.82	0.06
	Interaction	565.8	5.48	0.05							3.81	3.31	0.8							3.94	1.94	0.18							1.49	1.47	0.24							8.1	3.86	0.06							11.52	5.1	0.05
	Miglustat	266.74	2.59	0.12	263.45	2.56	0.12	4.66	0.01	0.29	2.74	2.33	0.14	2.39	2.03	0.17	3.51	0.05	0.23	4.41	2.15	0.16	3.17	1.55	0.23	4.02	0.05	0.26	0.02	0.01	0.91	0	0	0.97	2.17	0.11	0.16	11.29	6.17	0.05	10.56	5.78	0.05	7.71	0.001	0.4	1.78	0.93	0.35
	L inferior peduncle	530.46	5.15	0.05	442.57	4.3	0.05				5.87	4.99	0.05	5.14	4.37	0.05				15.87	7.75	0.01	14.54	7.1	0.05				5.39	5.15	0.05	4.95	4.73	0.05				16.23	8.87	0.01	13.88	7.59	0.01				12.66	6.59	0.05
	Interaction	642.4	6.24	0.05							3.78	3.21	0.09							4.38	2.14	0.16							1.41	1.35	0.26							14.76	8.07	0.01							19.22	10	0.01
	Miglustat	266.74	2.11	0.16	276.03	2.18	0.15	1.64	0.2	0.12	2.74	2.19	0.15	2.95	2.36	0.14	2.63	0.07	0.18	4.41	1.81	0.19	4.95	2.03	0.17	1.5	0.24	0.11	0.02	0.01	0.92	0.02	0.02	0.89	0.6	0.63	0.05	11.29	4.53	0.05	10.77	4.32	0.05	2.54	0.08	0.18	1.78	0.67	0.42
	R superior peduncle	352.59	2.79	0.11	354.57	2.81	0.11				6.91	5.53	0.05	6.99	5.6	0.05				4.91	2.01	0.17	5.12	2.1	0.16				2.07	1.75	0.2	2.08	1.77	0.2				6.61	2.65	0.12	6.4	2.57	0.12				6.75	2.56	0.12
	Interaction	3.04	0.02	0.88							0.22	0.18	0.68							1.62	0.67	0.43							0.03	0.03	0.88							1.12	0.45	0.51				* + .81, - 1.90			0.01	0.01	0.95
	Miglustat	266.74	2.37	0.14	122.76	1.09	0.31	3.24	0.05	0.22	2.74	2.2	0.15	1.18	0.95	0.34	2.69	0.07	0.19	4.41	1.83	0.19	3.13	1.3	0.27	1.65	0.2	0.12	0.02	0.01	0.91	0.03	0.02	0.88	0.85	0.48	0.07	11.29	5.37	0.05	5.66	2.69	0.11	5.2	0.01	0.31	1.78	0.74	0.4
	L superior peduncle	700.03	6.21	0.05	724.33	6.42	0.05				5.66	4.55	0.05	5.91	4.75	0.05				7.29	3.03	0.1	7.39	3.07	0.09				2.36	2.04	0.17	2.46	2.12	0.16				16.92	8.05	0.01	17.64	8.39	0.01				12.74	5.3	0.05
	Interaction	130.67	1.16	0.29							1.64	1.32	0.26							0.23	0.09	0.77							0.59	0.51	0.49							4.56	2.17	0.15				* + .82, - 1.87			2.2	0.92	0.35
	Miglustat	266.74	2.12	0.16	331.07	2.63	0.12	1.68	0.19	0.13	2.74	0.9	0.18	2.9	2.01	0.17	0.73	0.55	0.06	4.41	1.82	0.19	2.42	1	0.33	1.61	0.21	0.12	0.02	0.01	0.92	0.05	0.04	0.85	0.36	0.79	0.03	11.29	5.5	0.05	15.97	7.78	0.01	5.59	0.01	0.32	1.78	0.69	0.42
	R middle peduncle	216.83	1.72	0.2	220.96	1.75	0.2				0.02	0.02	0.9	0.03	0.02	0.9				7.22	2.99	0.1	7.24	2.99	0.1				1.06	0.88	0.36	1.07	0.89	0.36				12.97	6.32	0.05	13.24	6.45	0.05				1.72	0.67	0.42
	Interaction	152.75	1.21	0.28							0.39	0.27	0.61							0.07	0.03	0.87							0.24	0.2	0.66							10.18	4.96	0.05							7.44	2.89	0.1
	Miglustat	266.74	2.01	0.17	351.26	2.65	0.12	1.02	0.4	0.08	2.74	2.07	0.16	0.24	0.18	0.68	1.81	0.17	0.13	4.41	1.76	0.2	4.12	1.64	0.21	1.13	0.36	0.09	0.02	0.01	0.92	0.17	0.14	0.72	0.2	0.9	0.02	11.29	4.95	0.05	22.22	9.75	0.01	3.88	0.05	0.25	1.78	0.66	0.43
	L middle peduncle	43.37	0.33	0.58	79.8	0.6	0.45				2.63	1.98	0.17	3.69	2.78	0.11				3.62	1.44	0.24	4.07	1.62	0.22				0.45	0.37	0.55	0.62	0.51	0.49				3.53	1.55	0.23	7.35	3.22	0.08				0.54	0.2	0.66
	Interaction	96.49	0.73	0.4							1.85	1.39	0.25							0.48	0.19	0.67							0.28	0.23	0.64							11.68	5.12	0.05				* + .81, - 1.86			4.05	1.5	0.23
	Miglustat	266.74	2.22	0.15	107.35	0.89	0.36	2.35	0.09	0.17	2.74	2.17	0.15	1.04	0.83	0.37	2.49	0.08	0.18	4.41	2.13	0.16	1.08	0.52	0.48	3.81	0.05	0.25	0.02	0.02	0.91	0.18	0.18	0.68	2.62	0.06	0.18	11.29	4.58	0.05	6.7	2.72	0.11	2.72	0.06	0.19	1.78	0.69	0.42
	R white matter	465.21	3.88	0.06	499.88	4.17	0.05				4.86	3.85	0.06	5.31	4.21	0.05				17.31	8.35	0.01	18.15	8.75	0.01				7.77	7.67	0.01	7.54	7.44	0.01				7.36	2.99	0.1	7.84	3.18	0.09				6.55	2.53	0.13
	Interaction	114.72	0.96	0.34							1.84	1.46	0.24							2	0.97	0.34							0.17	0.17	0.69							1.42	0.58	0.46							1.94	0.75	0.4
	Miglustat	266.74	2.09	0.16	165.39	1.3	0.27	1.51	0.23	0.11	2.74	1.92	0.18	2.11	1.48	0.24	0.86	0.48	0.07	4.41	2.03	0.17	1.8	0.83	0.37	3.12	0.05	0.21	0.02	0.02	0.91	0.16	0.17	0.69	3.13	0.05	0.21	11.29	4.26	0.05	9.26	3.49	0.08	1.7	0.19	0.13	1.78	0.67	0.42
	L white matter	284.52	2.23	0.15	309.13	2.42	0.13				0.88	0.62	0.44	0.93	0.65	0.43				14.7	6.77	0.05	15.82	7.29	0.05				9.18	9.38	0.01	8.71	8.9	0.01				2.23	0.84	0.37	2.15	0.81	0.38				5.49	2.05	0.17
	Interaction	27.9	0.22	0.65							0.05	0.03	0.86							1.22	0.56	0.46							0.01	0.01	0.93							0	0	0.99							0.22	0.08	0.78
	Miglustat	266.74	2.16	0.16	145.32	1.18	0.29	1.94	0.15	0.14	2.741	2.24	0.15	1.02	0.84	0.37	2.93	0.05	0.2	4.41	2.04	0.17	1.44	0.67	0.42	3.18	0.05	0.21	0.02	0.01	0.92	0.02	0.02	0.9	0.31	0.83	0.03	11.29	4.62	0.05	6.55	2.68	0.12	2.82	0.06	0.19	1.78	0.69	0.42
	R cerebellum	390.4	3.16	0.09	371.55	3.01	0.1				6.14	5.01	0.05	7.25	5.92	0.05				12.39	5.73	0.05	14.65	6.77	0.05				1.08	0.89	0.36	0.37	0.31	0.59				7.19	2.94	0.1	8.51	3.48	0.08				5.12	1.98	0.17
	Interaction	63.26	0.51	0.48							1.88	1.54	0.23							3.82	1.77	0.2							0.02	0.01	0.91							2.22	0.91	0.35				* +.82, - 1.86			3.77	1.46	0.24
	Miglustat	266.74	2.21	0.15	159.96	1.33	0.26	2.27	0.1	0.16	2.741	2.36	0.14	1.16	1	0.33	3.74	0.05	0.24	4.41	2.12	0.16	1.71	0.82	0.38	3.73	0.05	0.24	0.02	0.01	0.92	0	0	0.95	0.55	0.66	0.04	11.29	4.57	0.05	8.02	3.25	0.09	2.69	0.07	0.19	1.78	0.7	0.42
	L cerebellum	507.68	4.21	0.05	478.73	3.97	0.06				8.57	7.39	0.05	9.62	8.3	0.01				15.64	7.5	0.01	17.83	8.55	0.01				1.93	1.63	0.22	1.12	0.94	0.34				7.83	3.17	0.09	7.53	3.05	0.09				6.79	2.65	0.12
	Interaction	47.03	0.39	0.54							1.7	1.47	0.24							3.3	1.58	0.22							0	0	0.97							0.8	0.33	0.58							2.72	1.06	0.32
	Miglustat	266.74	2.19	0.15	149.07	1.22	0.28	2.13	0.12	0.15	2.74	2.31	0.14	1.04	0.88	0.36	3.39	0.05	0.22	4.41	2.09	0.16	1.5	0.71	0.41	3.53	0.05	0.23	0.02	0.01	0.92	0.01	0.01	0.93	0.42	0.75	0.03	11.29	4.6	0.05	7.21	2.94	0.1	2.77	0.06	0.19	1.78	0.69	0.42
	Whole cerebellum	450.28	3.69	0.07	431.66	3.54	0.07				7.35	6.19	0.05	8.59	7.24	0.05				14.07	6.66	0.05	16.59	7.85	0.01				1.48	1.23	0.28	0.7	0.59	0.45				7.58	3.09	0.09	8.1	3.3	0.08				5.96	2.33	0.14
	Interaction	61.43	0.5	0.49							1.97	1.66	0.21							3.87	1.83	0.19							0	0	0.96							1.53	0.62	0.44				* + .82, - 1.86			3.44	1.34	0.26
V	Miglustat	266.74	2.22	0.15	313.35	2.6	0.12	2.3	0.1	0.16	2.74	2.17	0.15	2.87	2.27	0.15	2.47	0.08	0.17	4.41	1.98	0.17	5.36	2.41	0.13	2.75	0.06	0.19	0.02	0.01	0.91	0.06	0.05	0.83	1.25	0.31	0.1	11.29	5	0.05	12.82	5.67	0.05	4.02	0.05	0.26	1.78	0.78	0.39
	R inferior peduncle	558.1	4.64	0.05	379.72	3.15	0.09				0.75	0.59	0.45	0.17	0.13	0.72				13.17	5.92	0.05	13.06	5.87	0.05				4.07	3.63	0.07	2.55	2.28	0.15				13.77	6.09	0.05	15.68	6.94	0.05				18.82	8.21	0.01
	Interaction	6.46	0.05	0.82							5.87	4.65	0.05							0.81	0.36	0.56							0.13	0.11	0.74							2.16	0.96	0.34				* + .78, - 1.95			0.06	0.03	0.88
	Miglustat	266.74	2.2	0.15	238.84	1.97	0.17	2.23	0.11	0.16	2.74	2.09	0.16	4.24	3.23	0.09	1.94	0.15	0.14	4.41	2.05	0.17	3.41	1.59	0.22	3.26	0.05	0.22	0.02	0.01	0.91	0.09	0.08	0.79	0.92	0.45	0.08	11.29	5.16	0.05	7.97	3.64	0.07	4.51	0.01	0.28	1.78	0.77	0.39
	L inferior peduncle	534.77	4.42	0.05	524.24	4.33	0.05				1.15	0.88	0.36	0.19	0.14	0.71				15.58	7.25	0.05	16.58	7.71	0.01				2.65	2.3	0.14	1.78	1.54	0.23				13.82	6.31	0.05	17.55	8.01	0.01				18.03	7.83	0.01
	Interaction	8.1	0.07	0.8							3.74	2.85	0.11							1.04	0.49	0.5							0.52	0.45	0.51							4.53	2.07	0.16				* + .81, - 1.90			0.45	0.19	0.67
	Miglustat	266.74	2.73	0.11	165.04	1.69	0.21	5.57	0.01	0.32	2.74	2.37	0.14	2.46	2.13	0.16	3.81	0.05	0.25	4.41	2.68	0.12	2.44	1.48	0.24	7.81	0.001	0.4	0.02	0.01	0.91	0	0	0.97	2.47	0.08	0.17	11.29	6.49	0.05	6.52	3.75	0.07	8.71	0.001	0.43	1.78	0.92	0.35
	R superior peduncle	1299.66	13.32	0.001	1363.6	13.98	0.001				10.38	8.99	0.01	9.48	8.22	0.01				32.61	19.78	0.0001	34.19	20.74	0.0001				7.57	7.39	0.05	7.15	6.99	0.05				28.75	16.54	0.001	32.99	18.98	0.001				29.34	15.1	0.001
	Interaction	63.98	0.66	0.43							0.08	0.07	0.8							1.58	0.96	0.34							0	0	0.97							5.41	3.11	0.09				* + .83, - 1.84			1.79	0.92	0.35
	Miglustat	266.74	2.48	0.13	85.78	0.8	0.38	3.97	0.05	0.25	2.74	2.33	0.14	2.66	2.26	0.15	3.52	0.05	0.23	4.41	2.47	0.13	0.57	0.32	0.58	6.3	0.01	0.35	0.02	0.02	0.91	0.02	0.02	0.9	3.11	0.05	0.21	11.29	5.96	0.05	1.53	0.81	0.38	7.04	0.001	0.38	1.78	0.84	0.37
	L superior peduncle	1011.34	9.4	0.01	846.23	7.87	0.01				8.44	7.17	0.05	4.39	3.73	0.07				28.82	16.13	0.001	26.32	14.73	0.001				8.57	8.75	0.01	5.22	5.33	0.05				24.87	13.12	0.001	28.47	15.02	0.001				23.95	11.3	0.01
	Interaction	2.12	0.02	0.89							1.25	1.07	0.31							0.54	0.3	0.59							0.56	0.57	0.46							3.83	2.02	0.17				* + .82, - 1.87			1.03	0.48	0.5
	Miglustat	266.74	2.1	0.16	326.18	2.56	0.12	1.55	0.23	0.12	2.74	2.07	0.16	3.05	2.3	0.14	1.85	0.16	0.14	4.41	1.93	0.18	5.98	2.62	0.12	2.4	0.09	0.17	0.02	0.01	0.91	0.15	0.14	0.72	2.11	0.12	0.15	11.29	4.41	0.05	12.83	5.01	0.05	2.17	0.11	0.16	1.78	0.71	0.41
	R middle peduncle	231.54	1.82	0.19	246.96	1.94	0.18				0.06	0.04	0.84	0.12	0.09	0.77				11.3	4.95	0.05	11.58	5.07	0.05				4.56	4.34	0.05	4.89	4.65	0.05				4.54	1.77	0.2	4.74	1.85	0.19				6.43	2.57	0.12
	Interaction	91.84	0.72	0.41							4.52	3.42	0.08							0.72	0.32	0.58							2.08	1.98	0.17							0.87	0.34	0.57				* + .76, - 1.91			5.03	2.01	0.17
	Miglustat	266.74	2.15	0.16	205.73	1.55	0.23	1.01	0.4	0.08	2.74	2.12	0.16	1.86	1.44	0.24	2.12	0.12	0.15	4.41	1.94	0.18	4.96	2.18	0.15	2.44	0.09	0.17	0.02	0.02	0.91	0.02	0.02	0.89	2.6	0.07	0.18	11.29	4.45	0.05	11.43	4.5	0.05	2.3	0.1	0.16	1.78	0.74	0.4
	L middle peduncle	295.82	2.38	0.14	135.82	1.02	0.32				0.18	0.14	0.72	0.4	0.31	0.59				10.8	4.75	0.05	11.44	5.03	0.05				5.56	5.48	0.05	6.18	6.09	0.05				4.96	1.95	0.18	5.38	2.12	0.16				7.59	3.15	0.09
	Interaction	0.58	0	0.95							5.33	4.11	0.06							1.47	0.65	0.43							2.35	2.32	0.14							1.25	0.49	0.49				* + .76, - 1.91			7.13	2.96	0.1
	Miglustat	266.74	2.17	0.15	245.66	2	0.17	2.03	0.13	0.15	2.74	2.05	0.17	3.27	2.45	0.13	1.72	0.18	0.13	4.41	2.09	0.16	2.79	1.32	0.26	3.53	0.05	0.23	0.02	0.02	0.91	0.05	0.05	0.83	2.87	0.0502	0.2	11.29	4.54	0.05	10.67	4.29	0.05	2.58	0.07	0.18	1.78	0.71	0.41
	R white matter	469.3	3.82	0.06	420.46	3.43	0.08				3.18	2.38	0.14	2.4	1.8	0.19				17.78	8.42	0.01	17.78	8.42	0.01				8.08	8.11	0.01	6.99	7.02	0.05				7.55	3.03	0.1	6.57	2.64	0.12				10.16	4.03	0.06
	Interaction	12.59	0.1	0.76							0.98	0.73	0.4							0.18	0.09	0.77							0.48	0.48	0.5							0.4	0.16	0.7				* + .83, - 1.87			0.76	0.3	0.59
	Miglustat	266.74	2.21	0.15	254.32	2.11	0.16	2.26	0.1	0.16	2.74	2.07	0.16	2.9	2.19	0.15	1.82	0.17	0.13	4.41	2.1	0.16	3.86	1.83	0.19	3.61	0.05	0.24	0.02	0.02	0.9	0.01	0.01	0.92	4.06	0.05	0.26	11.29	4.63	0.05	11.03	4.52	0.05	2.86	0.06	0.2	1.78	0.72	0.41
	L white matter	529.31	4.38	0.05	515.85	4.27	0.05				2.59	1.95	0.18	2.34	1.76	0.2				18.34	8.73	0.01	18.31	8.71	0.01				10.1	10.97	0.01	9.7	10.53	0.01				8.99	3.69	0.07	8.7	3.57	0.07				11.47	4.66	0.05
	Interaction	21.47	0.18	0.68							1.89	1.43	0.25							0	0	0.97							1.1	1.2	0.29							0.64	0.26	0.62				* + .83, - 1.88			1.47	0.6	0.45
	Miglustat	266.74	2.03	0.17	296.37	2.25	0.15	1.12	0.36	0.09	2.74	2.16	0.16	4.53	3.57	0.07	2.42	0.09	0.17	4.41	1.92	0.18	5.43	2.36	0.14	2.28	0.1	0.16	0.02	0.01	0.92	0	0	0.99	0.63	0.61	0.05	11.29	4.31	0.05	11.27	4.3	0.05	1.86	0.15	0.14	1.78	0.66	0.43
	R cerebellum	153.56	1.17	0.29	174.43	1.33	0.26				4.29	3.38	0.08	5.66	4.46	0.05				10.64	4.62	0.05	11.33	4.92	0.05				1.98	1.68	0.21	1.53	1.3	0.27				3.03	1.15	0.29	3.31	1.26	0.27				1.85	0.68	0.42
	Interaction	22.96	0.17	0.68							2.17	1.71	0.2							0.69	0.3	0.59							0.22	0.18	0.68							0.28	0.11	0.75				* + .80, - 1.90			2.19	0.81	0.38
	Miglustat	266.74	2.01	0.17	205.73	1.55	0.23	1.01	0.4	0.08	2.74	2.09	0.16	3.44	2.63	0.12	1.98	0.14	0.15	4.41	1.89	0.18	4.28	1.84	0.19	2.1	0.12	0.15	0.02	0.01	0.91	0.21	0.18	0.68	0.82	0.5	0.07	11.29	4.25	0.05	7.82	2.94	0.1	1.68	0.19	0.13	1.78	0.64	0.43
	L cerebellum	135.24	1.02	0.32	135.82	1.02	0.32				4.22	3.23	0.09	4.48	3.42	0.08				9.89	4.24	0.05	10.12	4.34	0.05				1.66	1.43	0.24	1.45	1.25	0.28				2.05	0.77	0.39	2	0.75	0.4				1.96	0.71	0.41
	Interaction	0.58	0	0.95							0.82	0.63	0.44							0.36	0.16	0.7							1.18	1.02	0.32							0.03	0.01	0.92				* + .81, - 1.88			0.41	0.15	0.71
	Miglustat	266.74	2.02	0.17	252.09	1.91	0.18	1.07	0.38	0.08	2.74	2.13	0.16	4.08	3.18	0.09	2.22	0.11	0.16	4.41	1.91	0.18	4.9	2.12	0.16	2.24	0.11	0.16	0.02	0.01	0.91	1.47	0.05	0.83	0.72	0.55	0.06	11.29	4.28	0.05	9.5	3.6	0.07	1.75	0.18	0.13	1.78	0.65	0.43
	Whole cerebellum	148.37	1.12	0.3	155.52	1.18	0.29				4.38	3.41	0.08	5.14	4	0.06				10.57	4.58	0.05	11.08	4.8	0.05				1.86	1.59	0.22	0.64	1.25	0.28				2.57	0.97	0.34	2.58	0.98	0.33				1.97	0.72	0.41
	Interaction	7.58	0.06	0.82							1.45	1.13	0.3							0.54	0.23	0.64							0.64	0.54	0.47							0.02	0.01	0.93				* + .81, - 1.89			1.13	0.41	0.53
MD	Miglustat	266.74	2.23	0.15	215.92	1.81	0.19	2.41	0.09	0.17	2.74	2.42	0.13	2.17	1.92	0.18	4.14	0.05	0.26	4.41	2.25	0.15	3.99	2.03	0.17	4.68	0.01	0.29	0.02	0.01	0.91	0.09	0.07	0.79	1.31	0.29	0.1	11.29	4.67	0.05	6.71	2.77	0.11	3	0.05	0.2	1.78	0.69	0.42
	R inferior peduncle	561.34	4.7	0.05	594.46	4.97	0.05				10.87	9.62	0.01	11.18	9.9	0.01				22.2	11.21	0.01	23.03	11.73	0.01				4.2	3.76	0.07	3.42	3.06	0.09				10.27	4.25	0.05	10.17	4.21	0.05				7.21	2.8	0.11
	Interaction	34.51	0.29	0.6							0.42	0.37	0.55							1.13	0.57	0.46							0.16	0.14	0.72	0.16	0.14					0.17	0.07	0.8							1.89	0.73	0.4
	Miglustat	266.74	2.19	0.15	201.6	1.66	0.21	2.14	0.12	0.16	2.74	2.47	0.13	2.75	2.48	0.13	4.4	0.01	0.27	4.41	2.22	0.15	4.27	2.15	0.16	4.52	0.01	0.28	0.02	0.01	0.91	0.04	0.03	0.86	1.43	0.26	0.11	11.29	4.79	0.05	9.11	3.34	0.08	3.35	0.05	0.22	1.78	0.69	0.42
	L inferior peduncle	512.37	4.21	0.05	401.24	3.3	0.08				11.46	10.31	0.01	10.3	9.26	0.01				21.79	10.99	0.01	18.96	9.56	0.01				4.54	4.1	0.06	2.37	2.15	0.16				12.41	5.26	0.05	0.02	3.86	0.06				8.06	3.13	0.09
	Interaction	4.29	0.04	0.86							0.49	0.44	0.52							0.69	0.35	0.56							0.19	0.17	0.69							0.02	0.01	0.93				* + .83, - 1.86			0.76	0.29	0.6
	Miglustat	266.74	2.02	0.17	80.58	0.61	0.45	1.06	0.38	0.08	2.74	2.27	0.15	3.28	2.71	0.11	3.13	0.05	0.21	4.41	1.82	0.19	0.88	0.36	0.56	1.59	0.22	0.12	0.02	0.01	0.91	0.57	0.48	0.5	0.78	0.52	0.06	11.29	4.2	0.05	4.86	1.81	0.19	1.52	0.23	0.12	1.78	0.63	0.44
	R superior peduncle	145.04	1.1	0.3	124.52	0.94	0.34				7.54	6.24	0.05	8.43	6.98	0.05				6.73	2.78	0.11	5.76	2.38	0.14				1.47	1.26	0.27	0.89	0.76	0.39				0.96	0.36	0.56	0.86	0.32	0.58				0.78	0.28	0.61
	Interaction	7.87	0.06	0.81							1.07	0.88	0.36							0.38	0.16	0.7							1.24	1.06	0.31							0.02	0.01	0.94							0.04	0.02	0.91
	Miglustat	266.74	2.22	0.15	357.5	2.98	0.1	2.34	0.1	0.17	2.74	2.44	0.13	4.4	3.92	0.06	4.23	0.05	0.27	4.41	2.02	0.17	4.32	1.98	0.17	3.05	0.05	0.21	0.02	0.01	0.91	0	0	0.99	0.86	0.48	0.07	11.29	4.73	0.05	12.13	5.08	0.05	3.17	0.05	0.21	1.78	0.7	0.41
	L superior peduncle	478.45	3.98	0.06	498.74	4.15	0.05				9.57	8.52	0.01	9.98	8.89	0.01				15.29	7.01	0.05	15.46	7.09	0.05				2.92	2.52	0.13	2.88	2.49	0.13				10.13	4.24	0.05	10.47	4.38	0.05				5.4	2.12	0.16
	Interaction	96.64	0.8	0.38							1.96	1.74	0.2							0.27	0.12	0.73							0.03	0.03	0.87							1.28	0.54	0.47				* + .81, - 1.88			4.4	1.72	0.2
	Miglustat	266.74	2.51	0.13	463.12	4.35	0.05	4.14	0.05	0.26	2.74	2.44	0.13	4.11	3.65	0.07	4.21	0.05	0.27	4.41	2.55	0.12	7	4.05	0.06	6.93	0.001	0.37	0.02	0.02	0.9	0.25	0.27	0.61	3.64	0.05	0.24	11.29	4.93	0.05	13.22	5.77	0.05	3.8	0.05	0.25	1.78	0.75	0.4
	R middle peduncle	719.61	6.76	0.05	1001.38	9.41	0.01				8.99	7.99	0.01	11.32	10.06	0.01				26.12	15.13	0.001	31.38	18.18	0.001				8.92	9.42	0.01	10.3	10.89	0.01				11.29	4.93	0.05	14.56	6.36	0.05				8.77	3.7	0.07
	Interaction	334.83	3.15	0.09							2.48	2.21	0.15							5.36	3.1	0.09							1.39	1.47	0.24							3.55	1.55	0.23							7.43	3.14	0.09
	Miglustat	266.74	2.44	0.13	345.29	3.16	0.09	3.73	0.05	0.24	2.74	2.09	0.16	1.86	1.42	0.25	1.97	0.14	0.14	4.41	2.77	0.11	5.18	3.25	0.09	8.48	0.001	0.42	0.02	0.02	0.9	0.14	0.16	0.7	4.79	0.01	0.29	11.29	4.73	0.05	11.55	4.84	0.05	3.18	0.05	0.21	1.78	0.74	0.4
	L middle peduncle	715.91	6.55	0.05	920.75	8.43	0.01				4.96	3.78	0.06	4.67	3.56	0.07				31.24	19.6	0.0001	36.05	22.62	0.0001				10.68	12.14	0.01	12.57	14.29	0.001				9.05	3.79	0.06	11.23	4.7	0.05				9.68	4.04	0.06
	Interaction	238.39	2.18	0.15							0.03	0.02	0.88							4.87	3.06	0.09							1.95	2.22	0.15							2.4	1.01	0.33							5.67	2.37	0.14
	Miglustat	266.74	2.33	0.14	238.23	2.09	0.16	3.05	0.05	0.21	2.74	2.47	0.13	2.48	2.23	0.15	4.4	0.01	0.27	4.41	2.26	0.15	3.28	1.68	0.21	4.78	0.01	0.29	0.02	0.02	0.91	0.02	0.02	0.91	3.18	0.05	0.21	11.29	4.64	0.05	9.26	3.81	0.06	2.9	0.05	0.2	1.78	0.71	0.41
	R white matter	608.32	5.32	0.05	729.96	6.39	0.05				9.11	8.2	0.01	11.06	9.95	0.01				20.69	10.6	0.01	23.2	11.88	0.01				8.85	9.08	0.01	9.27	9.51	0.01				9.2	3.78	0.06	9.87	4.06	0.06				7.56	3.01	0.1
	Interaction	171.5	1.5	0.23							2.83	2.55	0.12							2.87	1.47	0.24	2.87						0.42	0.43	0.52							0.68	0.28	0.6							3.59	1.43	0.25
	Miglustat	266.74	2.19	0.15	240.63	1.97	0.17	2.13	0.12	0.15	2.74	2.29	0.14	2.44	2.04	0.17	3.27	0.05	0.22	4.41	2.2	0.15	3.59	1.79	0.19	4.32	0.05	0.27	0.02	0.02	0.91	0.01	0.01	0.95	2.61	0.07	0.18	11.29	4.45	0.05	8.8	3.46	0.08	2.29	0.1	0.16	1.78	0.68	0.42
	L white matter	450.83	3.7	0.07	510.95	4.19	0.05				7.93	6.63	0.05	8.98	7.51	0.01				19.91	9.91	0.01	21.54	10.72	0.01				7.78	7.67	0.01	7.56	7.45	0.01				6.09	2.4	0.14	5.09	2	0.17				5.96	2.26	0.15
	Interaction	60.15	0.49	0.49							1.05	0.88	0.36							1.7	0.85	0.37							0.13	0.13	0.73							0.04	0.02	0.9							0.94	0.36	0.56
	Miglustat	266.74	2.31	0.14	175.21	1.52	0.23	2.9	0.05	0.2	2.74	2.63	0.12	1.4	1.34	0.26	5.45	0.01	0.32	4.41	2.39	0.14	2.46	1.33	0.26	5.74	0.01	0.33	0.02	0.01	0.91	0	0	0.99	1.83	0.16	0.14	11.29	4.96	0.05	9.01	3.96	0.06	3.89	0.05	0.25	1.78	0.74	0.4
	R cerebellum	711.98	6.17	0.05	718.6	6.23	0.05				13.27	12.72	0.01	14.24	13.65	0.001				26.83	14.55	0.001	26.14	14.18	0.001				5.77	5.37	0.05	4.58	4.27	0.05				15.29	6.71	0.05	13.78	6.05	0.05				12.15	5.03	0.05
	Interaction	26.07	0.23	0.64							1.06	1.01	0.33							0.53	0.29	0.6							0.11	0.1	0.76							0.02	0.01	0.94				* + .85, - 1.84			2.48	1.03	0.32
	Miglustat	266.74	2.27	0.15	175.39	1.49	0.23	2.66	0.07	0.19	2.74	2.67	0.12	1.21	1.18	0.29	5.73	0.01	0.33	4.41	2.27	0.15	2.53	1.3	0.27	4.85	0.01	0.29	0.02	0.01	0.91	0	0	0.97	1.62	0.21	0.12	11.29	4.93	0.05	9.02	3.94	0.06	3.81	0.05	0.25	1.78	0.71	0.41
	L cerebellum	661.64	5.64	0.05	640.32	5.45	0.05				13.86	13.5	0.001	14.88	14.49	0.001				23.82	12.26	0.01	22.27	11.46	0.01				4.93	4.52	0.05	3.74	3.43	0.08				14.8	6.46	0.05	12.87	5.62	0.05				10.45	4.17	0.05
	Interaction	7.06	0.06	0.81							1.04	1.02	0.33							0.05	0.03	0.87							0.35	0.32	0.58							0.06	0.03	0.87							1.08	0.43	0.52
	Miglustat	266.74	2.29	0.14	174.45	1.5	0.23	2.79	0.06	0.19	2.74	2.66	0.12	1.29	1.25	0.28	5.65	0.01	0.33	4.41	2.33	0.14	2.47	1.31	0.27	5.3	0.01	0.31	0.02	0.01	0.91	0	0	0.98	1.73	0.18	0.13	11.29	4.95	0.05	9	3.94	0.06	3.87	0.05	0.25	1.78	0.72	0.41
	Whole cerebellum	691.31	5.94	0.05	682.01	5.86	0.05				13.68	13.26	0.001	14.69	14.24	0.001				25.46	13.46	0.001	24.26	12.82	0.01				5.37	4.97	0.05	4.16	3.85	0.06				15.16	6.64	0.05	13.39	5.87	0.05				11.35	4.61	0.05
	Interaction	14.72	0.13	0.73							1.06	1.03	0.32							0.22	0.12	0.74							0.22	0.2	0.66							0.01	0	0.97							1.68	0.68	0.42
Key: R=Right; L=Left; FA=Fractional Anisotropy; V=Volume; MD=Mean Diffusivity
[truncated: 132 more columns]

## Sheet: Sheet4
Table S4. Spearman Correlations of Cerebellar Measures with Total Severity Score
	Cerebellar Measures	Severity Score
		r	p
FA	R inferior peduncle	-0.38	0.0156
	L inferior peduncle	-0.35	0.0281
	R superior peduncle	-0.35	0.0308
	L superior peduncle	-0.41	0.0103
	R white matter	-0.33	0.0396
	R cerebellum	-0.42	0.0082
	L cerebellum	-0.35	0.0271
	Whole cerebellum	-0.4	0.0111
V	R inferior peduncle	-0.35	0.0278
	R superior peduncle	-0.46	0.0031
	L superior peduncle	-0.49	0.0014
MD	R middle peduncle	0.35	0.027
	R white matter	0.33	0.0409
	R cerebellum	0.37	0.0204
	L cerebellum	0.35	0.0304
	Whole cerebellum	0.37	0.0214
Key: R=Right; L=Left; FA=Fractional Anisotropy; V=Volume; MD=Mean Diffusivity

## Sheet: Sheet5
Table S5. Multiple Regression of Total Severity Scores on Cerebellar Measures and Age at Scan
				Severity Score
			Parameter			Model	Model	Model
Cerebellar Measures		r	Estimate	t value	p <	F value	p <	R-square
FA	R inferior peduncle	-0.02	-78.01	-2.14	0.05	6.01	0.01	0.25
	Age at scan	0.39	1.16	3.47	0.01
	R white matter	-0.09	-202.26	-2.48	0.05	6.94	0.01	0.28
	Age at scan		1.16	3.67	0.001
	L white matter	-0.11	-214	-2.62	0.05	7.38	0.01	0.29
	Age at scan		1.16	3.76	0.001
V	R inferior peduncle	-0.17	-0.03	-2.48	0.05	6.95	0.01	0.28
	Age at scan	0.39	1.02	3.52	0.01
	L inferior peduncle	-0.19	-0.03	-2.32	0.05	6.48	0.01	0.26
	Age at scan		0.94	3.33	0.01
	R superior peduncle	-0.35	-0.03	-3.12	0.01	9.08	0.001	0.34
	Age at scan		0.88	3.38	0.01
	L superior peduncle	-0.36	-0.03	-3.07	0.01	8.87	0.001	0.33
	Age at scan		0.85	3.27	0.01
	R middle peduncle	-0.11	-0.01	-2.29	0.05	6.42	0.01	0.26
	Age at scan		1.07	3.5	0.01
	L middle peduncle	-0.14	-0.003	-2.42	0.05	6.78	0.01	0.27
	Age at scan		1.05	3.54	0.01
	R white matter	-0.25	-0.003	-2.66	0.05	7.5	0.01	0.29
	Age at scan		0.94	3.43	0.01
	L white matter	-0.29	-0.003	-3.21	0.01	9.42	0.001	0.34
	Age at scan		1.01	3.78	0.01
MD	R middle peduncle	0.19	16112	2.25	0.05	6.31	0.01	0.26
	Age at scan		0.93	3.29	0.01
	L middle peduncle	0.2	16918	2.4	0.05	6.71	0.01	0.27
	Age at scan		0.95	3.37	0.01
	R white matter	0.2	12378	2.18	0.05	6.12	0.01	0.25
	Age at scan		0.89	3.2	0.01
	R cerebellum	0.4	5248.47	2.1	0.05	5.92	0.01	0.25
	Age at scan		0.58	2.03	0.05
	L cerebellum	0.39	5035.14	2.08	0.05	5.86	0.01	0.25
	Age at scan		0.6	2.12	0.05
	Whole cerebellum	0.4	5182.6	2.1	0.05	5.92	0.01	0.25
	Age at scan		0.58	2.07	0.05
Key: R=Right; L=Left; FA=Fractional Anisotropy; V=Volume; MD=Mean Diffusivity

## Sheet: Sheet6
Table S6. ANCOVA of NPC Neurological Total Severity and Subcategory Scores, Miglustat and Cerebellar Measures
					Severity Score
Cerebellar Measures /		Type I			Type III			Model	Model	Model
Miglustat		SS	F value	p <	SS	F value	p <	F value	p <	R-square
FA	Miglustat	266.74	2.58	0.12	197.29	1.91	0.18	4.63	0.01	0.28
	R inferior peduncle	600.57	5.82	0.05	503.01	4.87	0.05
	Interaction	565.8	5.48	0.05
	Miglustat	266.74	2.59	0.12	263.45	2.56	0.12	4.66	0.01	0.29
	L inferior peduncle	530.46	5.15	0.05	442.57	4.3	0.05
	Interaction	642.4	6.24	0.05
	Miglustat	266.74	2.37	0.14	122.76	1.09	0.31	3.24	0.05	0.22
	L superior peduncle	700.03	6.21	0.05	724.33	6.42	0.05
	Interaction	130.67	1.16	0.29
V	Miglustat	266.74	2.73	0.11	165.04	1.69	0.21	5.57	0.01	0.32
	R superior peduncle	1299.66	13.32	0.001	1363.6	13.98	0.001
	Interaction	63.98	0.66	0.43
	Miglustat	266.74	2.48	0.13	85.78	0.8	0.38	3.97	0.05	0.25
	L superior peduncle	1011.34	9.4	0.01	846.23	7.87	0.01
	Interaction	2.12	0.02	0.89
MD	Miglustat	266.74	2.51	0.13	463.12	4.35	0.05	4.14	0.05	0.26
	R middle peduncle	719.61	6.76	0.05	1001.38	9.41	0.01
	Interaction	334.83	3.15	0.09
	Miglustat	266.74	2.44	0.13	345.29	3.16	0.09	3.73	0.05	0.24
	L middle peduncle	715.91	6.55	0.05	920.75	8.43	0.01
	Interaction	238.39	2.18	0.15
	Miglustat	266.74	2.33	0.14	238.23	2.09	0.16	3.05	0.05	0.21
	R white matter	608.32	5.32	0.05	729.96	6.39	0.05
	Interaction	171.5	1.5	0.23
	Miglustat	266.74	2.31	0.14	175.21	1.52	0.23	2.9	0.05	0.2
	R cerebellum	711.98	6.17	0.05	718.6	6.23	0.05
	Interaction	26.07	0.23	0.64
Key: R=Right; L=Left; FA=Fractional Anisotropy; V=Volume; MD=Mean Diffusivity

## Sheet: Sheet7
Table S7. Cerebellar Measures Between Miglustat Groups
(Mann-Whitney-Wilcoxon t-test)
Cerebellar Measures		Miglustat
		p
FA	R inferior cerebellar peduncle	0.07
	L inferior cerebellar peduncle	0.3
	R superior cerebellar peduncle	0.91
	L superior cerebellar peduncle	0.84
	R middle cerebellar peduncle	0.33
	L middle cerebellar peduncle	0.91
	R cerebellum white matter	0.15
	L cerebellum white matter	0.33
	R cerebellum	0.91
	L cerebellum	0.98
	Whole cerebellum	0.87
V	R inferior cerebellar peduncle	0.87
	L inferior cerebellar peduncle	0.65
	R superior cerebellar peduncle	0.78
	L superior cerebellar peduncle	0.36
	R middle cerebellar peduncle	0.63
	L middle cerebellar peduncle	0.63
	R cerebellum white matter	0.56
	L cerebellum white matter	0.78
	R cerebellum	0.98
	L cerebellum	0.54
	Whole cerebellum	0.91
MD	R inferior cerebellar peduncle	0.47
	L inferior cerebellar peduncle	0.27
	R superior cerebellar peduncle	0.89
	L superior cerebellar peduncle	0.89
	R middle cerebellar peduncle	0.56
	L middle cerebellar peduncle	0.33
	R cerebellum white matter	0.4
	L cerebellum white matter	0.32
	R cerebellum	0.33
	L cerebellum	0.36
	Whole cerebellum	0.34
Key: R=Right; L=Left; FA=Fractional Anisotropy; V=Volume; MD=Mean Diffusivity
